# Supplementary material for: Phylostratigraphic profiles reveal a deep evolutionary history of the vertebrate head sensory systems
Source: PubMed Central journal article supplement (PMC3636138; doi:10.1186/1742-9994-10-18), 2013-04-12
Supplement: 1742-9994-10-18-S1.pdf [file 1742-9994-10-18-S1.pdf]

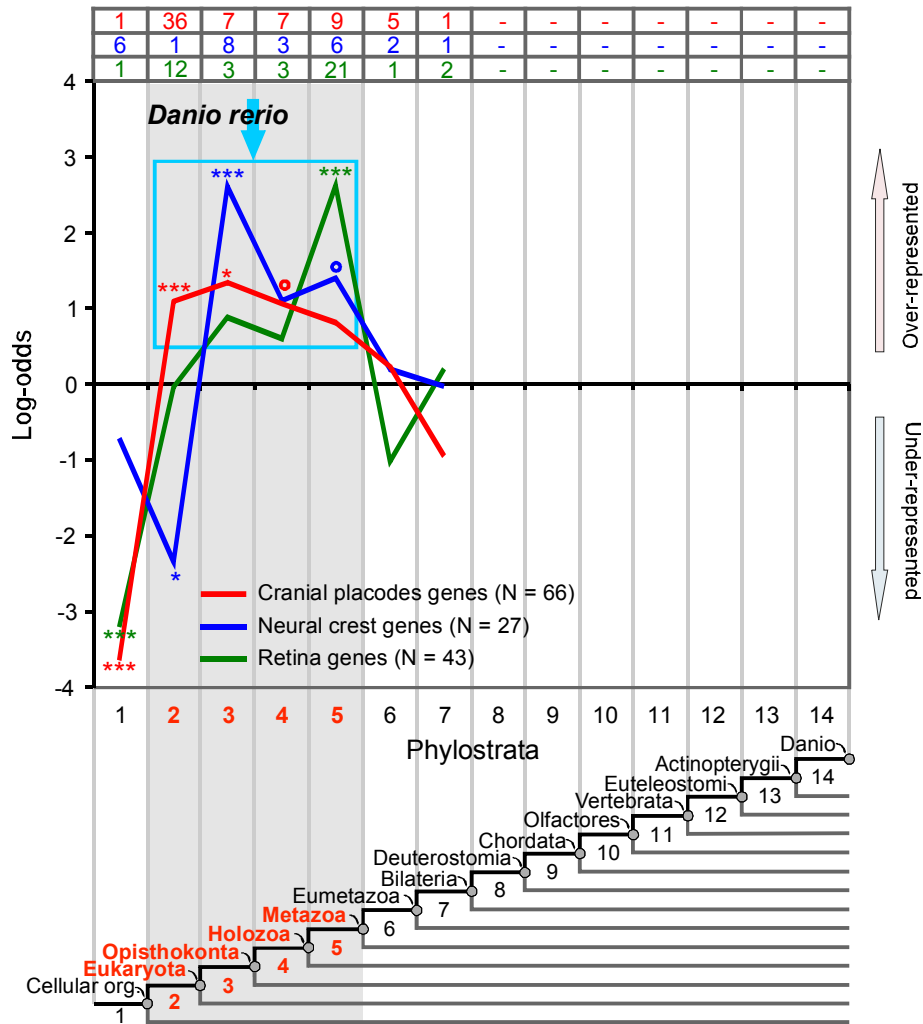

Figure S1 – Phylostratigraphic analysis of the key developmental genes involved in the development of placodes, neural crest and retina.
